# Supplementary material for: A single amino acid polymorphism in the glycosyltransferase CpsK defines four Streptococcus suis serotypes
Source: PubMed Central journal article supplement (PMC5481389; doi:10.1038/s41598-017-04403-3), 2017-06-22
Supplement: 41598_2017_4403_MOESM1_ESM.pdf [file 41598_2017_4403_MOESM1_ESM.pdf]

1 **Supplementary information for manuscript:**  
2 **A single amino acid polymorphism in the glycosyltransferase CpsK**  
3 **defines four *Streptococcus suis* serotypes**

4 **David Roy<sup>1</sup>, Taryn B.T. Athey<sup>2</sup>, Jean-Philippe Auger<sup>1</sup>, Guillaume Goyette-Desjardins<sup>1</sup>, Marie-**  
5 **Rose Van Calsteren<sup>1,3</sup>, Daisuke Takamatsu<sup>4,5</sup>, Masatoshi Okura<sup>4</sup>, Sarah Teatero<sup>2</sup>, Martín**  
6 **Alcorlo<sup>6</sup>, Juan A. Hermoso<sup>6</sup>, Mariela Segura<sup>1</sup>, Marcelo Gottschalk<sup>1</sup> & Nahuel Fittipaldi<sup>2,7\*</sup>**

7 <sup>1</sup>Swine and Poultry Infectious Diseases Research Centre, Faculty of Veterinary Medicine, University  
8 of Montreal, Saint-Hyacinthe, QC J2S 2M2, Canada.

9 <sup>2</sup>Public Health Ontario, Toronto Laboratory, Toronto, ON M5G 1M1, Canada.

10 <sup>3</sup>Saint-Hyacinthe Research and Development Centre, Agriculture and Agri-Food Canada, Saint-  
11 Hyacinthe, QC J2S 8E3, Canada.

12 <sup>4</sup>Division of Bacterial and Parasitic Diseases, National Institute of Animal Health, National Agriculture  
13 and Food Research Organization, Tsukuba, Ibaraki, 305-0856, Japan.

14 <sup>5</sup>The United Graduate School of Veterinary Sciences, Gifu University, Gifu, Gifu, 501-1193, Japan

15 <sup>6</sup>Department of Crystallography and Structural Biology, Instituto de Química-Física “Rocasolano”,  
16 Consejo Superior de Investigaciones Científicas, 28006 Madrid, Spain.

17 <sup>7</sup>Department of Laboratory Medicine and Pathobiology, University of Toronto, Toronto, ON M5S 1A8,  
18 Canada

19 **This supplementary file contains 3 Supplementary Tables and 4 Supplementary Figures.**

20 **Supplementary Table 1. Average yields for CPS purification of the different *S. suis* field and**  
 21 **mutant strains and CPS molecular weights.**

| Strain   | Serotype | Average yield $\pm$ SD <sup>a</sup><br>(number of replicates) | $M_w$ (kg/mol)                  | Reference    |
|----------|----------|---------------------------------------------------------------|---------------------------------|--------------|
| SS2      | 2        | 46.3 $\pm$ 19.1 (13) <sup>b</sup>                             | 435 $\pm$ 32.1 (4) <sup>b</sup> | <sup>1</sup> |
| SS2to1/2 | 1/2      | 51.0 (1)                                                      | 483 (1)                         | This work    |
| SS1/2    | 1/2      | 73.5 $\pm$ 2.1 (2)                                            | 709 (1)                         | <sup>2</sup> |
| SS1/2to2 | 2        | 44.6 (1)                                                      | 504 (1)                         | This work    |
| SS14     | 14       | 30.1 $\pm$ 14.8 (11) <sup>b</sup>                             | 421 $\pm$ 117 (3) <sup>b</sup>  | <sup>3</sup> |
| SS14to1  | 1        | 28.2 (1)                                                      | 490 (1)                         | This work    |
| SS1      | 1        | 37.5 $\pm$ 9.2 (2)                                            | 741 (1)                         | <sup>2</sup> |
| SS1to14  | 14       | 32.4 (1)                                                      | 571 (1)                         | This work    |

22 <sup>a</sup> Expressed in mg of CPS/6L of culture

23 <sup>b</sup> Means calculated from published and unpublished laboratory data.

24 **Supplementary Table 2. Bacterial strains and plasmids used in this study.**

| Strains/Plasmid           | General Characteristics                                                                                                                                                                                                 | Source/Reference |
|---------------------------|-------------------------------------------------------------------------------------------------------------------------------------------------------------------------------------------------------------------------|------------------|
| <i>Escherichia coli</i>   |                                                                                                                                                                                                                         |                  |
| TOP 10                    | F- <i>mrcA</i> $\Delta$ ( <i>mrr-hsdRMS-mcrBC</i> ) $\phi$ 80 <i>lacZ</i> $\Delta$ M5 $\Delta$ <i>lacX74</i><br><i>recA1 araD139</i> $\Delta$ ( <i>ara-leu</i> ) 7697 <i>galU galK rpsL</i> (StrR)<br><i>endA1 nupG</i> | ThermoFisher     |
| <i>Streptococcus suis</i> |                                                                                                                                                                                                                         |                  |
| SS2                       | Strain P1/7; ST1, serotype 2 strain isolated from a swine clinical case of infection in the United Kingdom. Identified as SS2 in this study.                                                                            | <sup>4</sup>     |
| SS1/2                     | Strain 2651; ST28 serotype 1/2 strain isolated from a swine clinical case of infection in Denmark. Identified as SS1/2 in this study.                                                                                   | <sup>5</sup>     |
| SS14                      | Strain DAN13730; ST6 serotype 14 strain isolated from a human case in The Netherlands. Identified as SS14 in this study.                                                                                                | <sup>6</sup>     |
| SS1                       | Strain 1659834; ST1 serotype 1 strain isolated from a swine clinical case of infection in Canada. Identified as SS1 in this study.                                                                                      | This work        |
| SS2to1/2                  | Isoallelic <i>cpsK</i> mutant of serotype 2 strain P1/7 carrying G483T mutation predicted to result in W161C substitution in mature CpsK                                                                                | This work        |

|          |                                                                                                                                                |           |
|----------|------------------------------------------------------------------------------------------------------------------------------------------------|-----------|
| SS1/2to2 | Isoallelic <i>cpsK</i> mutant of serotype 1/2 strain 2651 carrying T483G mutation predicted to result in C161W substitution in mature CpsK     | This work |
| SS14to1  | Isoallelic <i>cpsK</i> mutant of serotype 14 strain DAN13730 carrying G483T mutation predicted to result in W161C substitution in mature CpsK. | This work |
| SS1to14  | Isoallelic <i>cpsK</i> mutant of serotype 1 strain 1659834 carrying T483G mutation predicted to result in C161W substitution in mature CpsK.   | This work |

*Plasmids*

---

|             |                                                                                                                                            |              |
|-------------|--------------------------------------------------------------------------------------------------------------------------------------------|--------------|
| pCR2.1      | Ap <sup>r</sup> , Km <sup>r</sup> , <i>oriR</i> (f1) MCS <i>oriR</i> (ColE1)                                                               | ThermoFisher |
| pSET-4s     | Thermosensitive vector for allelic replacement.<br>Replication functions of pG+host3, MCS <i>oriR</i> pUC19<br><i>lacZ</i> Sp <sup>R</sup> | <sup>7</sup> |
| p4cpskG483T | pSET-4s carrying the construct for allelic replacement in strain P1/7 (SS2) and strain DAN13730 (SS14)                                     | This work    |
| p4cpskT483G | pSET-4s carrying the construct for allelic replacement in strain 2651 (SS1/2) and strain 1659834 (SS1)                                     | This work    |

26 **Supplementary Table 3. Oligonucleotide primers used in this study.**

| Name        | Sequence (5' – 3')     | Constructs               |
|-------------|------------------------|--------------------------|
| sero1-2_ID1 | GCGGTATCTTTAATAGCCCTTG | p4cpskT483G              |
| sero14_ID1  | AGATACTATACGTTGGCAAG   | p4cpskG483T              |
| sero1-2_ID4 | CATAGTAACTCCCAACTCCCTG | p4cpskT483G, p4cpskG483T |
| sero14_ID5  | GAGATTCTTCTGGTGAATGACG | p4cpskT483G, p4cpskG483T |
| sero1-2_ID8 | CCCCGTTTTTCAGAAAGACAC  | p4cpskT483G, p4cpskG483T |

27

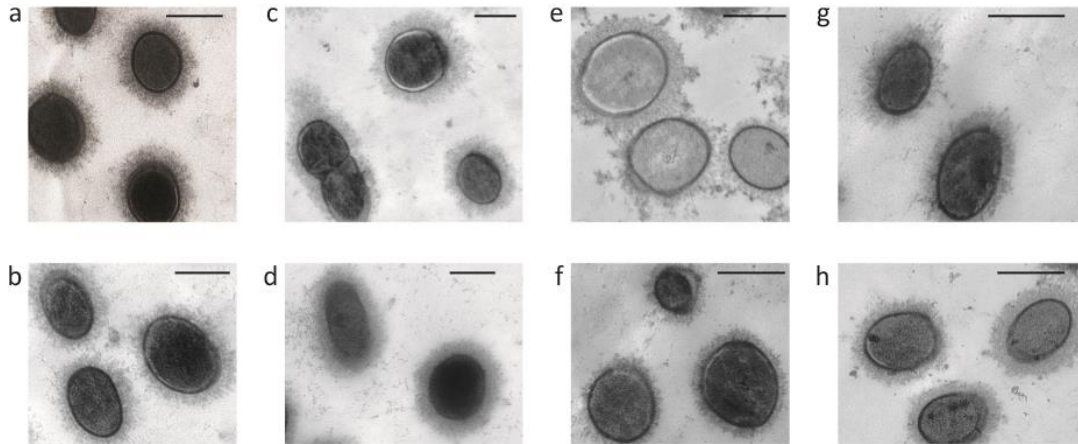

28

29 **Supplementary Figure 1. Transmission electron micrographs showing capsular polysaccharide**  
30 **(CPS) expression by *S. suis* field strains and derivative capsular switch mutants.** The CPS was  
31 stabilized with polyclonal antibodies directed against the CPS (see methods). **a**, Serotype 2 field  
32 strain. **b**, Mutant strain SS2to 1/2. **c**, Serotype 1/2 field strain. **d**, Mutant strain SS1/2to2. **e**,  
33 Serotype 14 field strain. **f**, Mutant strain SS14to1. **g**, Serotype 1 field strain. **h**, Mutant strain  
34 SS1to14. No noticeable differences were observed between field strains and corresponding  
35 derivative mutant strains in CPS expression. Bar: 500 nm.

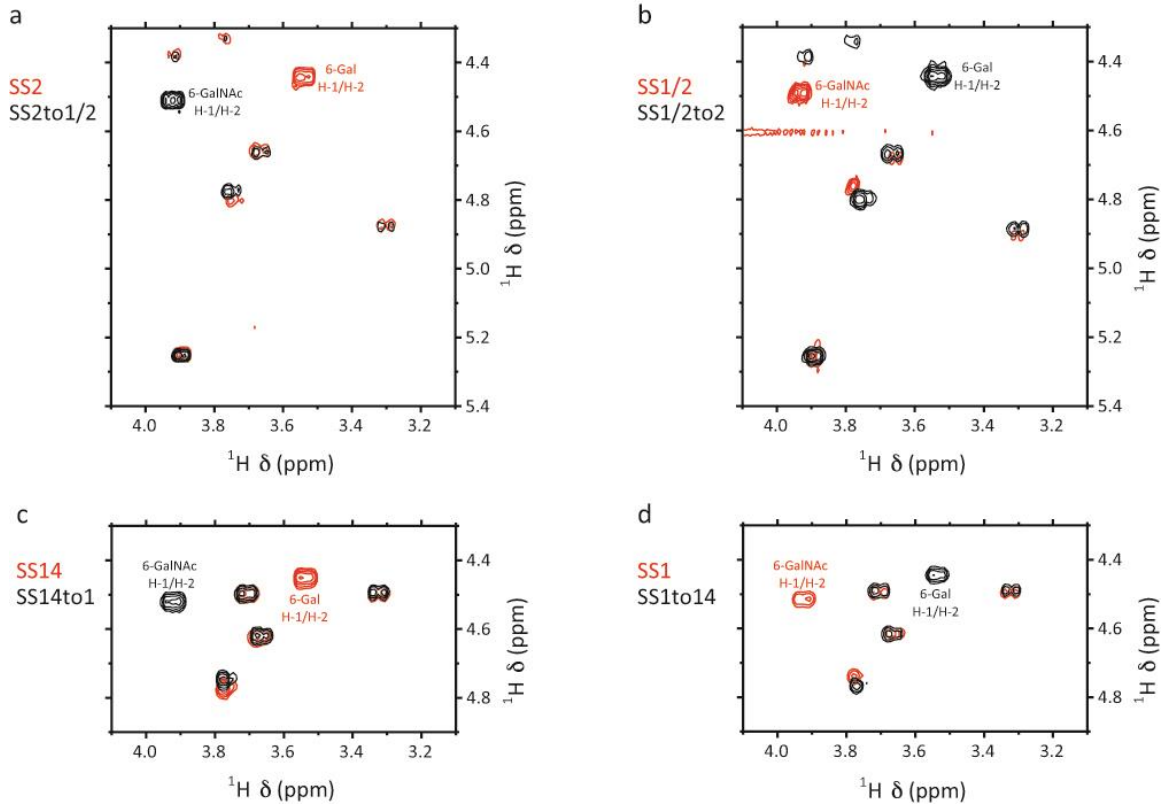

36

37 **Supplementary Figure 2. Portion of the ge-2D NMR COSY spectrum of *S. suis* CPSs in 33 mM**  
 38 **phosphate pD 8.0 in D<sub>2</sub>O.** In each panel, signals from the mutant and native CPSs are depicted in  
 39 black and red, respectively. **a**, Mutant SS2to1/2. 500 MHz, 77°C. 512 increments of 1 K complex  
 40 data points were acquired in magnitude mode with a digital resolution of 3.9 Hz/point in the  $t_2$   
 41 dimension and 7.8 Hz/point in the  $t_1$  dimension; the  $t_2$  dimension was processed by  
 42 multiplication with an unshifted sine bell window function and Fourier transform, and the  $t_1$   
 43 dimension was processed by Zhu-Bax linear prediction to 1024 points, multiplication with an  
 44 unshifted sine bell window function, Fourier transform, and magnitude calculation. Serotype 2  
 45 field strain. 500 MHz, 75°C. 512 increments of 1 K complex data points were acquired in  
 46 magnitude mode with a digital resolution of 4.6 Hz/point in the  $t_2$  dimension and 9.2 Hz/point in  
 47 the  $t_1$  dimension; processing was as above. **b**, Mutant SS1/2to2. 500 MHz, 75 °C. 512 increments  
 48 of 1 K complex data points were acquired in magnitude mode with a digital resolution of 4.9

49 Hz/point in the  $t_2$  dimension and 9.8 Hz/point in the  $t_1$  dimension; processing was as described  
50 in **a**. Serotype 1/2 field strain, 700 MHz, 42°C. 512 increments of 2 K complex data points were  
51 acquired in magnitude mode with a digital resolution of 3.4 Hz/point in the  $t_2$  dimension and  
52 13.7 Hz/point in the  $t_1$  dimension; processing was as described in **a. c**, Mutant strain SS14to1,  
53 500 MHz, 75 °C. Serotype 14 field strain, 500 MHz, 77°C. Acquisition and processing were as  
54 described in **b. d**, Mutant strain SS1to14, 500 MHz, 77°C. Serotype 1 field strain, 500 MHz, 65°C.  
55 Acquisition and processing were as described in **b**.



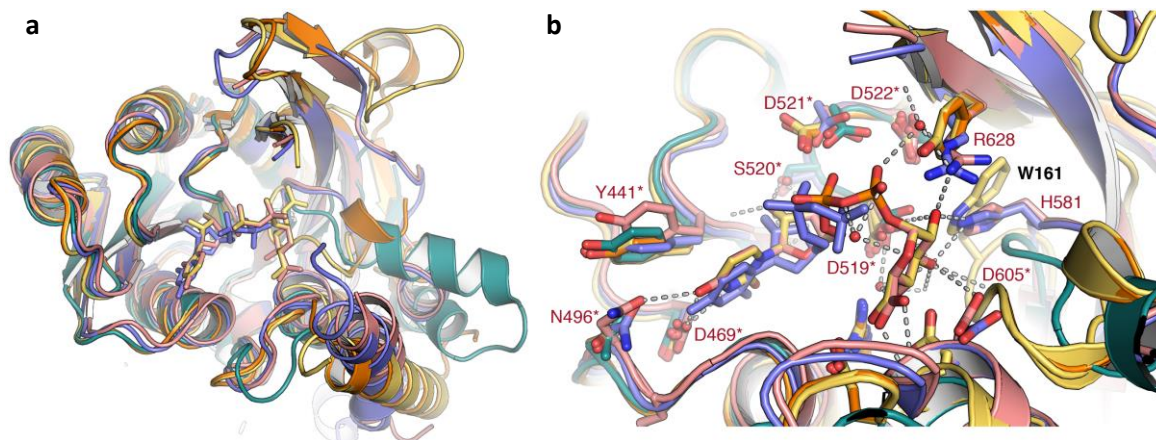

56 **Supplementary Figure 3. Structural and substrate-binding conservation in closest homologues**  
57 **of CpsK from *S. suis*.** **a**, Structural superposition of the model of CpsK from *S. suis* in complex  
58 with UDP-GalNAc (yellow ribbon and sticks) and the putative glycosyltransferase (GalT1) from  
59 *Streptococcus parasanguinis* (PDB code 5hec, orange ribbon), the chondroitin polymerase from  
60 *Escherichia coli* strain K4 in complex with UDP (PDB code 2z87, blue ribbon and sticks), the  
61 chondroitin polymerase from *Escherichia coli* strain K4 complexed with UDP-GlcUA (PDB code  
62 2z86, pink ribbon and sticks) and the glycosyltransferase from *Bacteroides fragilis* (PDB code  
63 3bcv, green ribbon). All these structures share a common fold with key residues interacting with  
64 the dinucleotide virtually overlapping. The estimated RMSD value for the C $\alpha$  backbone of the  
65 catalytic core between all the structures was less than 1.14 Å. **b**, Detailed view of the  
66 nucleotide-binding site in CpsK serotype 2 (yellow ribbon) in complex with UDP-GalNAc (yellow  
67 sticks) and its closest homologues (color code as in panel **a**). Residues involved in substrate  
68 binding are represented as capped sticks. Interactions between chondroitin polymerase from *E.*  
69 *coli* strain K4 and UDP-GlcUA (PDB code 2z86) are represented as dashed lines. Residues  
70 involved in the interaction are labeled. Asterisk indicates if the residue is conserved in CpsK.  
71 Trp161 in CpsK is depicted as yellow capped sticks to stress potential conservation of the  
72 interaction with O2 of Gal ring observed for His581 with glucuronic acid.

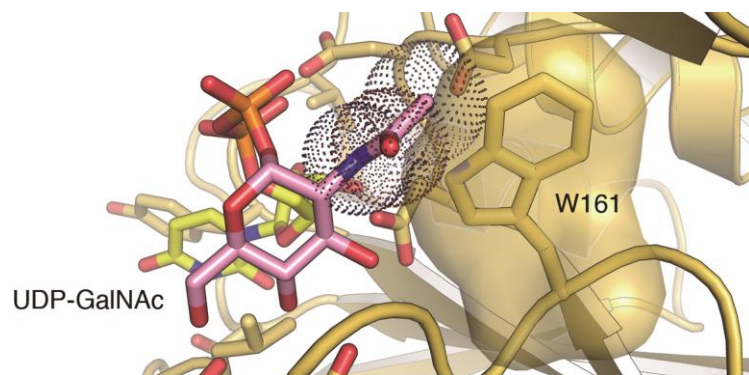

73

74 **Supplementary Figure 4. Steric hindrance between tryptophan 161 and the *N*-acetyl group of**  
75 **UDP-GalNAc.** Tryptophan residue is labeled and depicted in sticks with its molecular surface  
76 shown in yellow. The UDP-GalNAc is represented in sticks with the UDP moiety colored in yellow  
77 for C atoms and the GalNAc moiety colored in pink for C atoms. The Van der Waals radius of the  
78 *N*-acetyl group is shown as dots representation. The presence of bulky Trp residue at position  
79 161 would prevent binding of GalNAc at the active site of CpsK from serotype 2.

## 80 References

- 81 1. Van Calsteren MR, Gagnon F, Lacouture S, Fittipaldi N, Gottschalk M. Structure  
82 determination of *Streptococcus suis* serotype 2 capsular polysaccharide. *Biochem Cell*  
83 *Biol* **88**, 513-525 (2010).
- 84 2. Van Calsteren MR, *et al.* Explaining the serological characteristics of *Streptococcus suis*  
85 serotypes 1 and 1/2 from their capsular polysaccharide structure and biosynthesis. *J Biol*  
86 *Chem*, **291**, 8387-8398 (2016).
- 87 3. Van Calsteren MR, *et al.* Structure determination of *Streptococcus suis* serotype 14  
88 capsular polysaccharide. *Biochem Cell Biol* **91**, 49-58 (2013).
- 89 4. Slater JD, Allen AG, May JP, Bolitho S, Lindsay H, Maskell DJ. Mutagenesis of  
90 *Streptococcus equi* and *Streptococcus suis* by transposon *Tn917*. *Vet Microbiol* **93**, 197-  
91 206 (2003).
- 92 5. Jacques M, Gottschalk M, Foiry B, Higgins R. Ultrastructural study of surface  
93 components of *Streptococcus suis*. *J Bacteriol* **172**, 2833-2838 (1990).
- 94 6. Gottschalk M, Higgins R, Jacques M, Mittal KR, Henrichsen J. Description of 14 new  
95 capsular types of *Streptococcus suis*. *J Clin Microbiol* **27**, 2633-2636 (1989).
- 96 7. Takamatsu D, Osaki M, Sekizaki T. Thermosensitive suicide vectors for gene replacement  
97 in *Streptococcus suis*. *Plasmid* **46**, 140-148 (2001).

98
